# Supplementary material
Source: publisher figshare collection journal article supplement (https://gsajournals.figshare.com/ndownloader/files/26581028)
Supplement: Supplementary file 1 [file 26581028]

**File S1. Supplementary Data for**

Comparison of long read sequencing technologies in interrogating bacteria and fly genomes

Eric S. Tvedte*, Mark Gasser*1, Benjamin C. Sparklin*, Jane Michalski*†, Carl E. Hjelmen‡, J. Spencer Johnston§, Xuechu Zhao*, Robin Bromley*, Luke J. Tallon*, Lisa Sadzewicz*, David A. Rasko*†, Julie C. Dunning Hotopp*†**.

*Institute for Genome Sciences, University of Maryland School of Medicine, Baltimore, MD, 21201, USA

†Department of Microbiology and Immunology, University of Maryland School of Medicine, Baltimore, MD, 21201, USA

‡Department of Biology, Texas A&M University, College Station, TX, 77843, USA

§Department of Entomology, Texas A&M University, College Station, TX, 77843, USA

**Greenebaum Cancer Center, University of Maryland School of Medicine, Baltimore, MD, 21201, USA

1Present address: Johns Hopkins University Applied Physics Laboratory, Laurel, Maryland, 20723 USA

Corresponding author: Julie Dunning Hotopp, Institute for Genome Sciences, University of Maryland School of Medicine, 670 W. Baltimore St., HSF-III, #2106, Baltimore, MD 21201, USA. 410-706-5673. jdhotopp@som.umaryland.edu.

**Supplementary Figures**

Figure S1. Evidence of long read mapping to *E. coli* inversion region

Figure S2. Validation of a deletion region in *E. coli*.

Figure S3. Visualization of chimeric reads mapped to the *E. coli* genome

Figure S4. qPCR amplification of *E. coli* sequences

Figure S5. Distribution of modification QV values in *E. coli* PacBio libraries

Figure S6. Assessment of m6A modification in *E. coli* DNA motifs

Figure S7. *D. ananassae* k-mer assembly spectra copy number plots

Figure S8. Identification of chromosome 4 contigs in the Dana.UMIGS assembly

Figure S9. Identification of chromosome Y contigs in the Dana.UMIGS assembly

Figure S10. Methylated motifs in *D. ananassae*

**Supplementary Tables**

File S2. Supplementary Tables S1-S11

***Escherichia coli* E2348/69 assemblies**

File S3. *Escherichia coli* E2348/69 assembly Canu ONT RAPID unpolished

File S4. *Escherichia coli* E2348/69 assembly Canu ONT RAPID Pilon 1X polished

File S5. *Escherichia coli* E2348/69 assembly Flye ONT RAPID Flye polished

File S6. *Escherichia coli* E2348/69 assembly Unicycler ONT RAPID Pilon polished

File S7. *Escherichia coli* E2348/69 assembly Canu ONT LIG unpolished

File S8. *Escherichia coli* E2348/69 assembly Canu ONT LIG Pilon 1X polished

File S9. *Escherichia coli* E2348/69 assembly Flye ONT LIG Flye polished

File S10. *Escherichia coli* E2348/69 assembly Unicycler ONT LIG Pilon polished

File S11. *Escherichia coli* E2348/69 assembly Canu PB RSII unpolished

File S12. *Escherichia coli* E2348/69 assembly Canu PB RSII Pilon 1X polished

File S13. *Escherichia coli* E2348/69 assembly Flye PB RSII Flye polished

File S14. *Escherichia coli* E2348/69 assembly Unicycler PB RSII Pilon polished

File S15. *Escherichia coli* E2348/69 assembly Canu PB SQII CLR unpolished

File S16. *Escherichia coli* E2348/69 assembly Canu PB SQII CLR Pilon 1X polished

File S17. *Escherichia coli* E2348/69 assembly Flye PB SQII CLR Flye polished

File S18. *Escherichia coli* E2348/69 assembly Unicycler PB SQII CLR Pilon polished

File S19. *Escherichia coli* E2348/69 assembly HiCanu PB SQII HiFi unpolished

File S20. *Escherichia coli* E2348/69 assembly HiCanu PB SQII HiFi Pilon 1X polished

File S21. *Escherichia coli* E2348/69 assembly Flye PB SQII HiFi Flye polished

File S22. *Escherichia coli* E2348/69 assembly Unicycler PB SQII HiFi Pilon polished

File S23. *Escherichia coli* E2348/69 assembly Ecoli.UMIGS

***w*Ana-cured *Drosophila ananassae* Hawaiiassemblies**

File S24. *Drosophila ananassae* Hawaii assembly Canu ONT unpolished

File S25. *Drosophila ananassae* Hawaii assembly Canu ONT Pilon 1X polished

File S26. *Drosophila ananassae* Hawaii assembly Flye ONT Flye polished

File S27. *Drosophila ananassae* Hawaii assembly Flye ONT Flye+Pilon 1X polished

File S28. *Drosophila ananassae* Hawaii assembly Canu PB SQII CLR unpolished

File S29. *Drosophila ananassae* Hawaii assembly Flye PB SQII CLR Flye polished

File S30. *Drosophila ananassae* Hawaii assembly HiCanu PB SQII HiFi unpolished

File S31. *Drosophila ananassae* Hawaii assembly Flye PB SQII HiFi Flye polished

File S32. *Drosophila ananassae* Hawaii assembly Canu ONT + PB SQII CLR unpolished

File S33. *Drosophila ananassae* Hawaii assembly Dana.UMIGS

**Code for data processing and visualization**

File S34. R script for BED file formatting

File S35. R scripts for *Escherichia coli* E2348/69 data analysis

File S36. R scripts for *Drosophila ananassae* Hawaii data analysis
